# Supplementary material for: A Dark Septate Endophyte Improves Cadmium Tolerance of Maize by Modifying Root Morphology and Promoting Cadmium Binding to the Cell Wall and Phosphate
Source: MDPI journal article supplement (doi:10.3390/jof9050531), 2023-04-29
Supplement: s1 [file s1]

## Supplementary Materials

**Table S1.** DSE infection characteristics in maize roots

| Cd stress<br>(mg·kg <sup>-1</sup> ) | Treatment | Colonization<br>rate<br>(%) |
|-------------------------------------|-----------|-----------------------------|
| 0                                   | CK        | —                           |
|                                     | DSE       | 25.8±2.36 c                 |
| 5                                   | CK        | —                           |
|                                     | DSE       | 30.0±6.50 b                 |
| 10                                  | CK        | —                           |
|                                     | DSE       | 35.0±5.1 ab                 |
| 20                                  | CK        | —                           |
|                                     | DSE       | 42.6±4.1 a                  |

All values represent the means ± standard deviations,  $n=4$ . Cd: cadmium treatment, CK: the control of non-inoculation, DSE: *Exophiala pisciphila* inoculation. Different little letters in the table refer to  $p < 0.05$  according to the LSD test. "—" indicates the index of the material was not detected.

**Table S2.** Correlation analysis between plant biomass, root morphology and chemical forms, subcellular distribution

|                                                           | <b>Cd<br/>conten<br/>t</b> | <b>Biomass</b> | <b>Root<br/>length</b> | <b>Root<br/>surface<br/>area</b> | <b>Average<br/>root<br/>diameter</b> | <b>Root<br/>tips<br/>number</b> | <b>Root<br/>branch<br/>number</b> | <b>Root<br/>crossing<br/>number</b> |
|-----------------------------------------------------------|----------------------------|----------------|------------------------|----------------------------------|--------------------------------------|---------------------------------|-----------------------------------|-------------------------------------|
| <b>Cd<br/>Content</b>                                     | 1                          | -0.449**       | 0.371**                | 0.025                            | -0.381**                             | 0.594**                         | 0.319*                            | 0.374**                             |
| <b>Inorganic<br/>Cd</b>                                   | 0.589**                    | -0.399**       | 0.004                  | -0.167                           | -0.117                               | 0.168                           | -0.019                            | 0.001                               |
| <b>Water<br/>soluble Cd</b>                               | 0.604**                    | -0.340*        | 0.133                  | -0.063                           | -0.143                               | 0.366*                          | 0.075                             | 0.053                               |
| <b>Pectates<br/>and<br/>protein<br/>integrated<br/>Cd</b> | 0.811**                    | -0.303*        | 0.366*                 | 0.190                            | -0.448**                             | 0.785**                         | 0.190                             | 0.065                               |
| <b>Insoluble<br/>phosphate<br/>Cd</b>                     | 0.569**                    | 0.054          | 0.580**                | 0.047                            | -0.319*                              | 0.510**                         | 0.399*                            | 0.505**                             |
| <b>Oxalate Cd</b>                                         | 0.595**                    | -0.560**       | 0.208                  | -0.050                           | -0.302*                              | 0.389**                         | 0.218                             | 0.237                               |
| <b>Cell wall</b>                                          | 0.850**                    | -0.117         | 0.621**                | 0.146                            | -0.528**                             | 0.796**                         | 0.538**                           | 0.546**                             |
| <b>Soluble<br/>fractions</b>                              | 0.830**                    | -0.127         | 0.552**                | 0.116                            | -0.475**                             | 0.615**                         | 0.352*                            | 0.407**                             |
| <b>Organelle</b>                                          | 0.882**                    | -0.082         | 0.575**                | 0.166                            | -0.463*                              | 0.616**                         | 0.477**                           | 0.331**                             |

“\*” means significant difference ( $p < 0.05$ ), and “\*\*” means very significant difference ( $p < 0.01$ ), respectively.  $n=24$ .
